# Supplementary material
Source: Research Square preprint supplement (doi:10.21203/rs.3.rs-9264202/v1)

Figure 2  
Nephrin

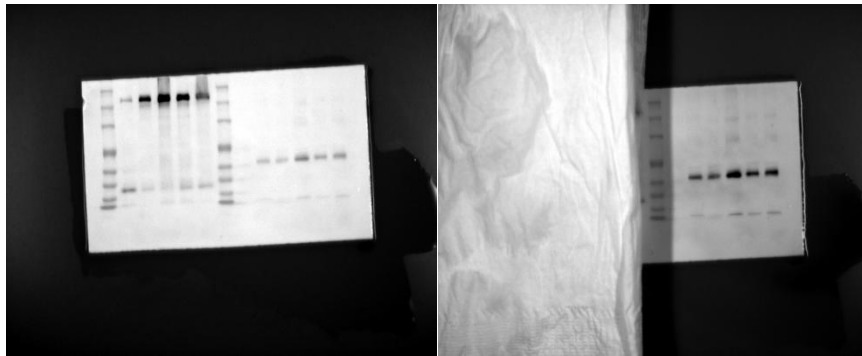

Podocin

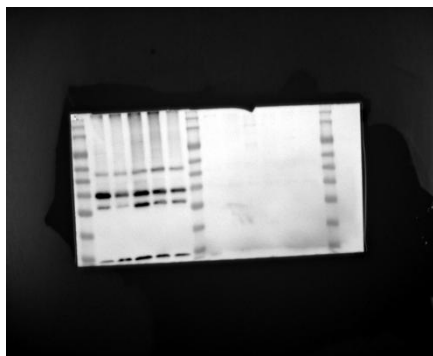

Synaptopodin

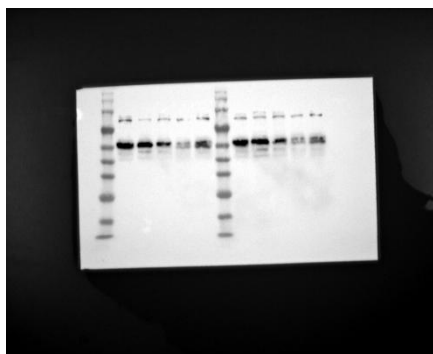

GAPDH

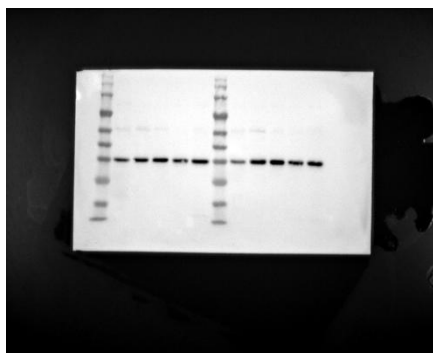

Figure 3

Podocin+GAPDH

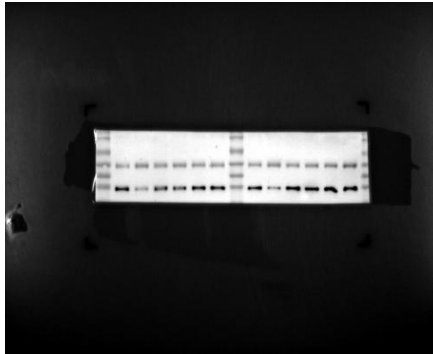

Synaptopodin

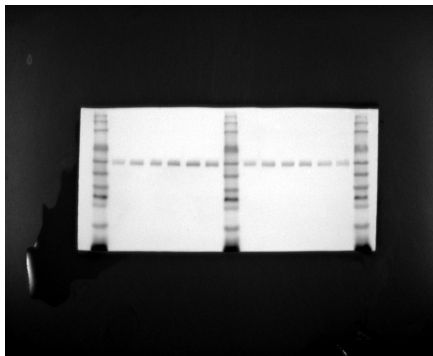

SIRT1

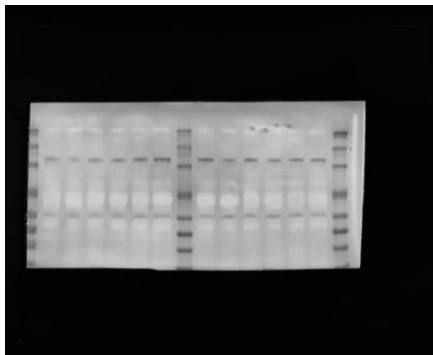

Figure 4

ATG5

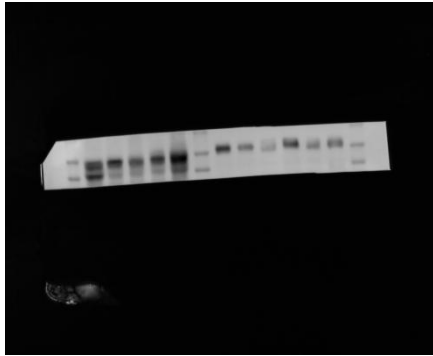

ATG7

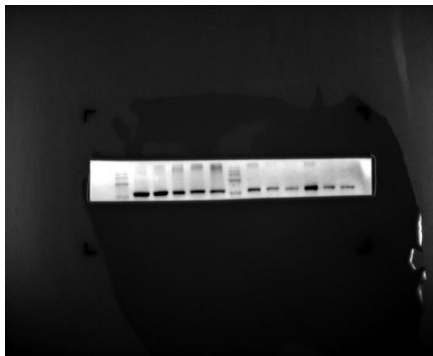

Beclin-1

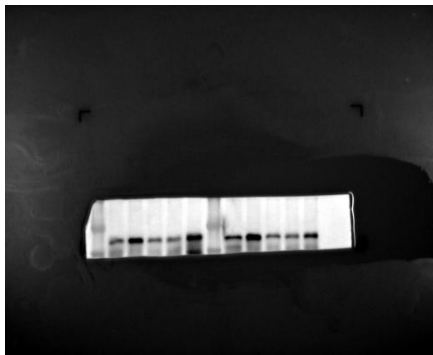

p62

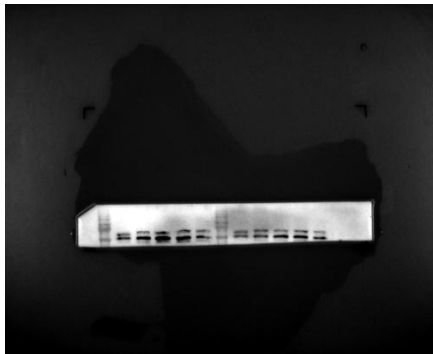

LC3 I/II

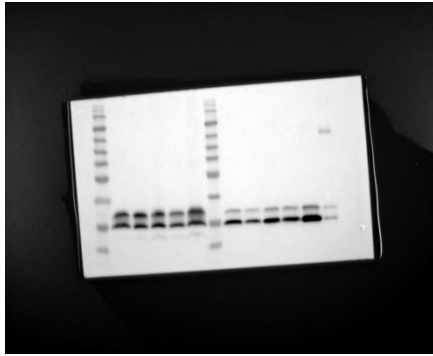

GAPDH

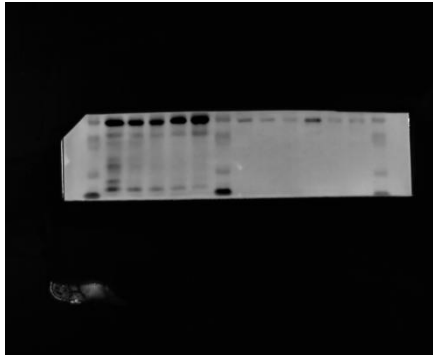

Figure 5

ATG5

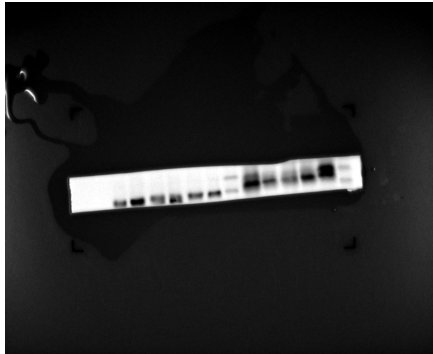

ATG7

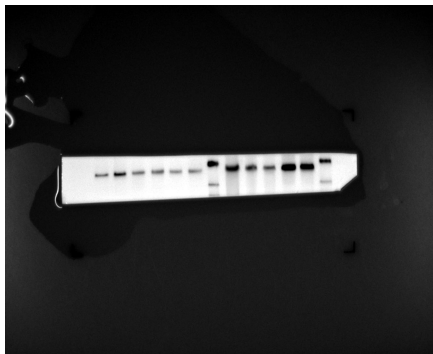

Beclin-1

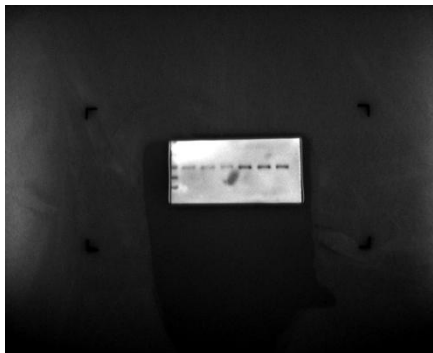

P62

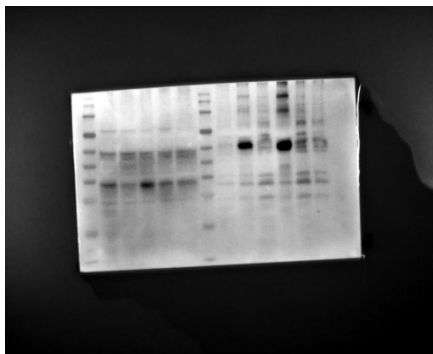

LC3

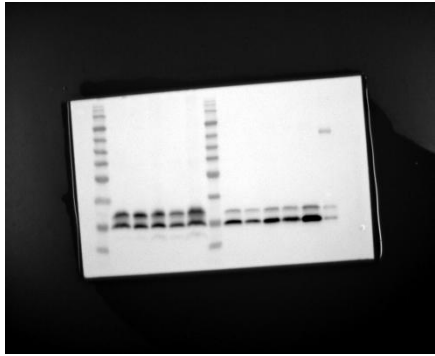

GAPDH

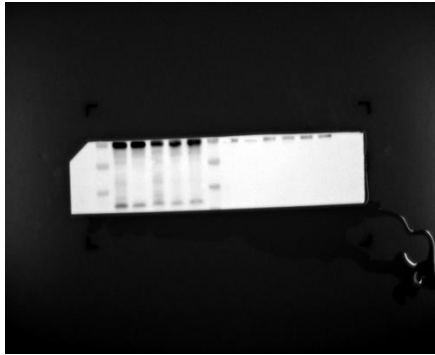

Figure 7 A

SIRT1

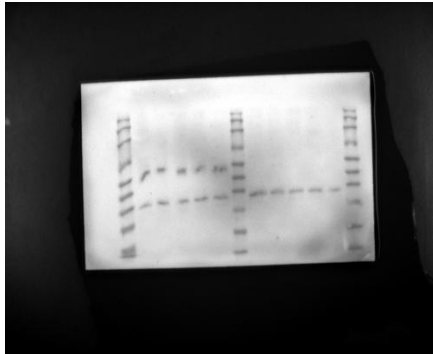

ATG7

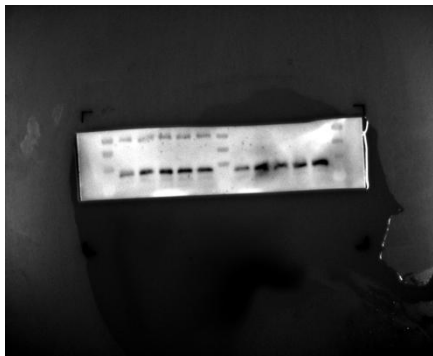

Beclin-1

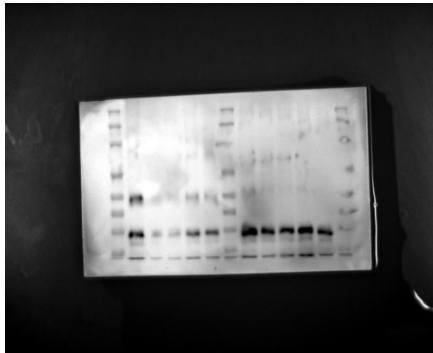

Figure 7 B

SIRT1

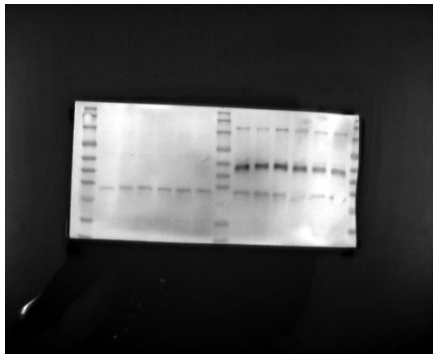

ATG7

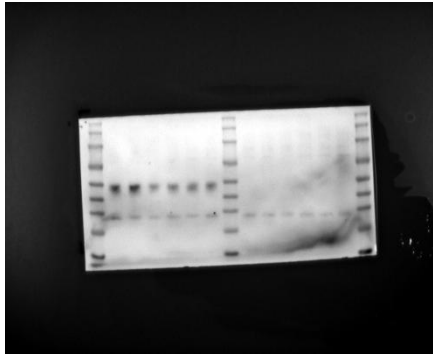

Beclin-1

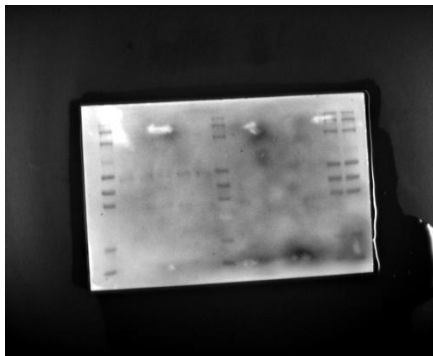

Figure 7C  
SIRT1

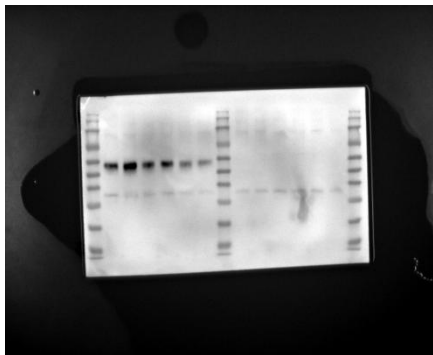

CTTN

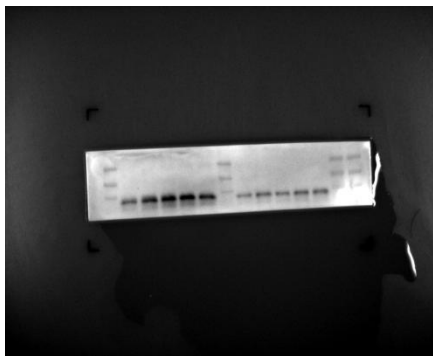

GAPDH

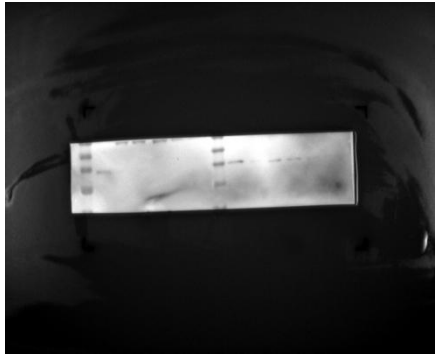

(cut wrong)

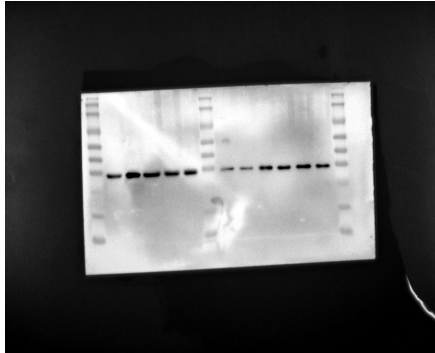

(redo)

Figure 7D

CTTN IP

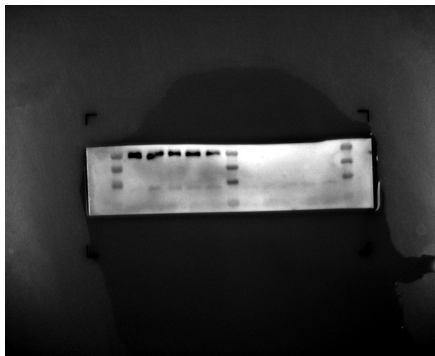

CTTN

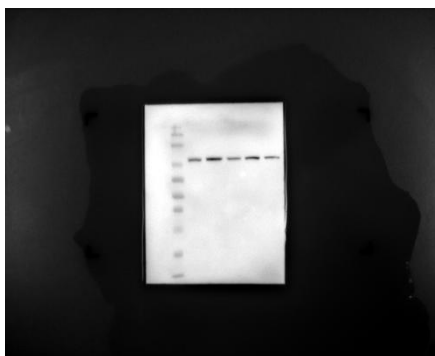

GAPDH

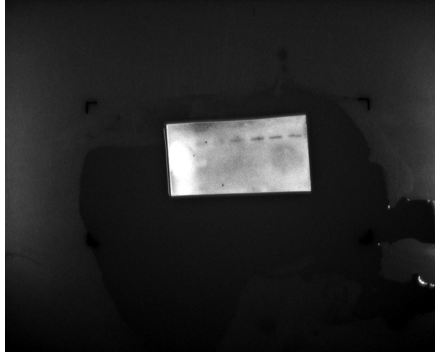

Figure 8  
Nephrin

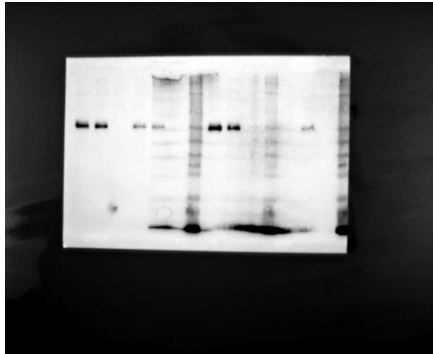

Podocin

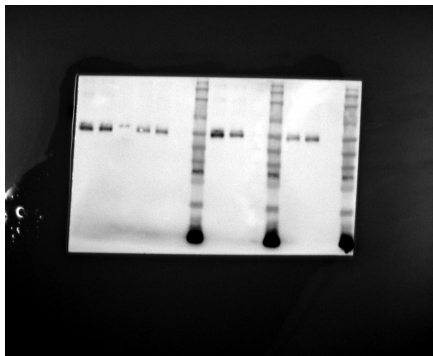

GAPDH

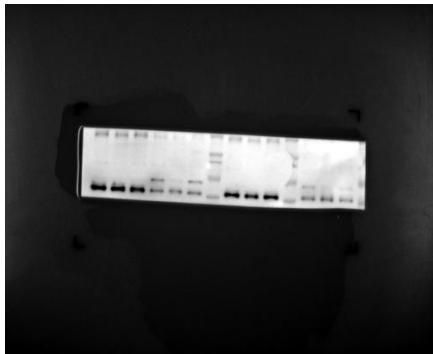

Figure S1

SIRT1

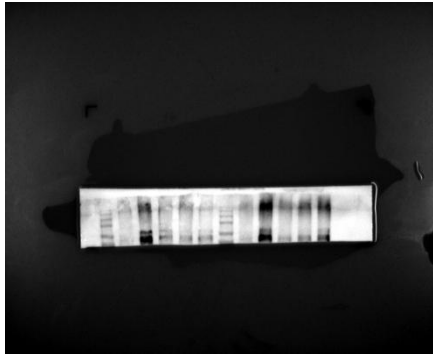

GAPDH

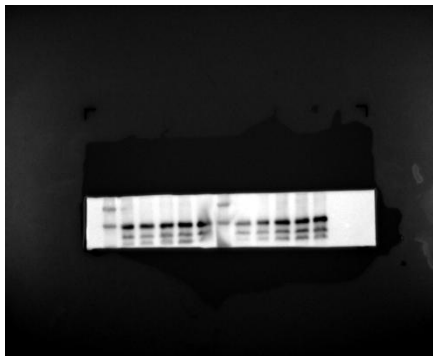

Supplement: Supplementary file 1 [file 7a856d280655e6ddf0b4e009.pdf]
